# Supplementary material for: Latent Profile Analysis of Technophobia and Its Network Associations with Health Self-Care Behaviors among Older Adults in Rural China
Source: Research Square preprint supplement (doi:10.21203/rs.3.rs-8067377/v1), 2025-12-01
Supplement: Supplementary file 1 [file 9983cb95d5a4f63e360be786.docx]

**Supplementary File S1.**

**Survey Questionnaire for Older Adults in Rural**

Dear Sir/Madam:

Hello! I am a student from the Department of Nursing at the College of Medical Science, Huzhou University. We are conducting a questionnaire survey to assess the general situation of older adults in rural areas. We kindly ask you to respond to the following questions based on your actual circumstances by filling in the answers on the corresponding blank lines or marking a "√" next to the appropriate options. This study is conducted under the principle of voluntary participation, and we assure you that your privacy will be safeguarded throughout this process. Please read each item carefully and provide responses according to your true situation. Thank you for your cooperation!

1. **Age**：_______
2. **Gender**：①Male ②Female
3. **Education level**：①Illiterate ②Primary school ③Junior high school ④Senior high school and above
4. **Marital status**：①Unmarried ②Married ③Divorced ④Widowed
5. **Religious belief**：①None ②Yes
6. **Number of children：** ①0 ②1  **③**2 ④≥3
7. **Chronic diseases**：①0 ②1  **③**2 ④≥3
8. **Monthly income**：①Low (＜1000) ②Middle (1000-3000) ③High (＞3000)
